# Supplementary material for: The serine protease hepsin mediates urinary secretion and polymerisation of Zona Pellucida domain protein uromodulin
Source: eLife. 2015 Dec 17;4:e08887. doi: 10.7554/eLife.08887 (PMC4755741; doi:10.7554/eLife.08887)
Supplement: Figure 2—source data 1. — DOI: http://dx.doi.org/10.7554/eLife.08887.005 [file elife-08887-fig2-data1.xlsx]

## Sheet: Sheet1
Figure 2-Panel A
Experiment	Quantification of the area of uromodulin polymers on the surface of MDCK cells after protease inhibitor treatment
ctr	pic	aebsf	aprotinin	leupeptin	e64	bestatin	pepstatin
1	0.0415794	0.386945	0.659966	0.382266	1.11278	1.15706	1.07172	Experiment 1
1.06986	0.0251105	0.340069	0.772968	0.338835	1.27458	1.01556	0.954672
1.07001	0.0624497	0.166461	0.657059	0.433605	0.944519	1.26558	1.44496
1.45923	0.0251284	0.439044	0.797094	0.543914	1.04516	0.966105	0.754057
1.6538	0.351032	0.320646	0.966329	0.375444	0.693713	0.765181	1.2489	Experiment 2
0.464836	0.24157	0.493571	0.552643	0.25286	0.670441	1.05962	2.91214
1	0.535082	0.242593	0.34037	0.314457	1.0107	1.23908	1.032
1.63063	0.246439	0.362966	0.590836	0.416145	0.954528	0.901332	0.881443
1.40669	0.276594	0.266823	0.863106	0.457837	1.10593	0.606929	0.930662
0.538119	0.349134	0.329642	1.04975	0.312443	0.7649	0.687507	0.769967
0.652005	0.191427	0.366795	0.610577	0.8893	1.59762	0.856438	0.692838
1.59176	0.260733	0.105584	0.86748	0.402644	1.2365	1.09195	1.03894
0.978065	0.286431	0.342186	0.78157	0.339363	0.473517	0.820605	0.798307
0.848815	0.356485	0.225726	0.843425	0.652745	1.05337	0.893697	0.704812	Experiment 3
0.670007	0.52254	0.276764	0.89933	0.772454	1.19084	0.52347	0.810929
1.10662	0.36954	0.25782	0.94502	0.63694	0.940213	0.87395	0.791881
1.10567	0.390109	0.353891	0.821023	0.919704	1.00134	0.578618	1.02839
0.929215	0.255231	0.506411	0.92915	0.660946	0.978303	1.03431	0.891877
1	0.47583	0.473846	0.707812	0.673258	1.02944	1.09535	0.976081
0.723867	0.218118	0.541635	0.683222	0.70386	0.980897	1.23368	0.896533
1.33094	0.311179	0.253839	0.608244	0.201293	0.912325	1.22255	0.936689
1.3535	0.297142	0.273344	0.574671	0.497034	1.10252	0.910462	1.04259
1.07198	0.276767	0.333027	0.750984	0.508061	1.00337	0.94541	1.02774	Average
0.347697	0.146143	0.110906	0.168819	0.203044	0.23064	0.22085	0.456285	s.d.
0.0741293	0.0311577	0.0236453	0.0359923	0.0432892	0.0491726	0.0470854	0.0972803	s.e.m.
1	0.258183	0.310665	0.700555	0.473945	0.935993	0.881926	0.958732	Ratio to WT
0.0691515	0.0290655	0.0220575	0.0335755	0.0403823	0.0458706	0.0439237	0.090748	s.e.m.
	< 0,0001	< 0,0001	0.0008	< 0,0001	0.5974	0.2267	0.2358	Mann Whitney
