# Supplementary material for: The serine protease hepsin mediates urinary secretion and polymerisation of Zona Pellucida domain protein uromodulin
Source: eLife. 2015 Dec 17;4:e08887. doi: 10.7554/eLife.08887 (PMC4755741; doi:10.7554/eLife.08887)
Supplement: Figure 2—source data 2. — DOI: http://dx.doi.org/10.7554/eLife.08887.006 [file elife-08887-fig2-data2.xlsx]

## Sheet: Sheet1
Figure2- Figure Supplement 2C
Experiment	Short cleavage inhibition by HAI-1 expression
exp 1						exp 2						exp 3
	UMOD	raw	Ratio	Average			UMOD	raw	Ratio	Average			UMOD	raw	Ratio
ctr	long	48189233	0.410984	0.352513		ctr	long	62490454	0.326945	0.376751		ctr	long	48576513	0.246591
	short	19805016					short	20430924					short	11978539
	long	55549475	0.294042				long	13343915	0.426558			HAI-1	long	38118321	0.0529209
	short	16333894					short	5691953					short	2017255
HAI-1	long	56934617	0.0555997	0.109277		HAI-1	long	9459844	0.112547	0.0993822
	short	3165548					short	1064678
	long	44020283	0.162955				long	12299572	0.0862172
	short	7173317					short	1060435
	Exp 1	Exp 2	Exp 3	Average	s.d.	Ratio	s.d.		ttest
ctr	0.352513	0.376751	0.246591	0.325285	0.0692202	1	0.212799		0.0153443
HAI-1	0.109277	0.0993822	0.0529209	0.0871934	0.0300904	0.268052	0.0925048
