# Supplementary material for: The serine protease hepsin mediates urinary secretion and polymerisation of Zona Pellucida domain protein uromodulin
Source: eLife. 2015 Dec 17;4:e08887. doi: 10.7554/eLife.08887 (PMC4755741; doi:10.7554/eLife.08887)
Supplement: Figure 5—source data 1. — DOI: http://dx.doi.org/10.7554/eLife.08887.013 [file elife-08887-fig5-data1.xlsx]

## Sheet: Hepsin
Figure 5- Panel B
Experiment	Transcript level of HPN in MDCK cells after shRNA transfection
Experiment 1
Sample	Hpn	average	s.d.		Sample	Gapdh	average	s.d.		Sample	ΔCt	Fold change	Average	s.d.	s.e.m.	Ratio to scr
MDCK scr	24.7	24.6667	0.0757188		MDCK scr	16.35	16.43	0.072111		MDCK scr	8.35	0.00306478	0.00332477	0.000311489	0.000179838	1
MDCK scr	24.72				MDCK scr	16.45				MDCK scr	8.27	0.00323953
MDCK scr	24.58				MDCK scr	16.49				MDCK scr	8.09	0.00367001
MDCK sh1Hpn	27.87	27.8667	0.0750555		MDCK sh1Hpn	16.55	16.5933	0.0378594		MDCK sh1Hpn	11.32	0.000391147	0.000404434	2.30131e-05	1.32866e-05	0.121643
MDCK sh1Hpn	27.94				MDCK sh1Hpn	16.62				MDCK sh1Hpn	11.32	0.000391147
MDCK sh1Hpn	27.79				MDCK sh1Hpn	16.61				MDCK sh1Hpn	11.18	0.000431007
MDCK sh2Hpn	27.35	27.21	0.121244		MDCK sh2Hpn	16.05	15.97	0.07		MDCK sh2Hpn	11.3	0.000396608	0.000413634	1.5033e-05	8.67928e-06	0.12441
MDCK sh2Hpn	27.14				MDCK sh2Hpn	15.92				MDCK sh2Hpn	11.22	0.000419221
MDCK sh2Hpn	27.14				MDCK sh2Hpn	15.94				MDCK sh2Hpn	11.2	0.000425074
MDCK sh1Prss8	24.94	24.9067	0.0493288		MDCK sh1Prss8	16.21	16.2133	0.0057735		MDCK sh1Prss8	8.73	0.00235509	0.00241658	7.97471e-05	4.6042e-05	0.726842
MDCK sh1Prss8	24.93				MDCK sh1Prss8	16.22				MDCK sh1Prss8	8.71	0.00238797
MDCK sh1Prss8	24.85				MDCK sh1Prss8	16.21				MDCK sh1Prss8	8.64	0.00250669
MDCK sh2Prss8	24.9	24.85	0.0781025		MDCK sh2Prss8	16.58	16.6067	0.023094		MDCK sh2Prss8	8.32	0.00312918	0.00330457	0.000215403	0.000124363	0.993923
MDCK sh2Prss8	24.89				MDCK sh2Prss8	16.62				MDCK sh2Prss8	8.27	0.00323953
MDCK sh2Prss8	24.76				MDCK sh2Prss8	16.62				MDCK sh2Prss8	8.14	0.003545
Experiment 2
Sample	Hpn	average	s.d.		Sample	Gapdh	average	s.d.		Sample	ΔCt	Fold change	Average	s.d.	s.e.m.	Ratio to scr
MDCK scr	24.95	24.96	0.0655744		MDCK scr	15.97	16.03	0.0519615		MDCK scr	8.98	0.00198039	0.00205225	0.00011275	6.50964e-05	1
MDCK scr	25.03				MDCK scr	16.06				MDCK scr	8.97	0.00199416
MDCK scr	24.9				MDCK scr	16.06				MDCK scr	8.84	0.0021822
MDCK sh1Hpn	27.28	27.15	0.117898		MDCK sh1Hpn	15.86	15.8667	0.0057735		MDCK sh1Hpn	11.42	0.000364953	0.000402185	3.38203e-05	1.95262e-05	0.195972
MDCK sh1Hpn	27.12				MDCK sh1Hpn	15.87				MDCK sh1Hpn	11.25	0.000410594
MDCK sh1Hpn	27.05				MDCK sh1Hpn	15.87				MDCK sh1Hpn	11.18	0.000431007
MDCK sh2Hpn	27.2	27.0867	0.100167		MDCK sh2Hpn	15.99	15.9867	0.0057735		MDCK sh2Hpn	11.21	0.000422137	0.000456284	3.06881e-05	1.77178e-05	0.222333
MDCK sh2Hpn	27.05				MDCK sh2Hpn	15.98				MDCK sh2Hpn	11.07	0.000465155
MDCK sh2Hpn	27.01				MDCK sh2Hpn	15.99				MDCK sh2Hpn	11.02	0.000481559
MDCK sh1Prss8	25.21	25.17	0.0360555		MDCK sh1Prss8	16.14	16.1367	0.0152753		MDCK sh1Prss8	9.07	0.00186062	0.00190883	4.22843e-05	2.44129e-05	0.930115
MDCK sh1Prss8	25.14				MDCK sh1Prss8	16.12				MDCK sh1Prss8	9.02	0.00192624
MDCK sh1Prss8	25.16				MDCK sh1Prss8	16.15				MDCK sh1Prss8	9.01	0.00193963
MDCK sh2Prss8	25.33	25.23	0.1		MDCK sh2Prss8	15.96	15.96	0.01		MDCK sh2Prss8	9.37	0.00151129	0.00162266	0.000119027	6.87203e-05	0.790671
MDCK sh2Prss8	25.23				MDCK sh2Prss8	15.95				MDCK sh2Prss8	9.28	0.00160858
MDCK sh2Prss8	25.13				MDCK sh2Prss8	15.97				MDCK sh2Prss8	9.16	0.0017481
Experiment 3
Sample	Hpn	average	s.d.		Sample	Gapdh	average	s.d.		Sample	ΔCt	Fold change	Average	s.d.	s.e.m.	Ratio to scr
MDCK scr	24.72	24.7467	0.064291		MDCK scr	17.68	17.6633	0.0208167		MDCK scr	7.04	0.00759887	0.00737805	0.000296524	0.000171198	1
MDCK scr	24.7				MDCK scr	17.64				MDCK scr	7.06	0.00749425
MDCK scr	24.82				MDCK scr	17.67				MDCK scr	7.15	0.00704102
MDCK sh1Hpn	26.96	26.8233	0.140119		MDCK sh1Hpn	16.81	16.8533	0.0404145		MDCK sh1Hpn	10.15	0.000880127	0.0010015	0.000114005	6.58209e-05	0.13574
MDCK sh1Hpn	26.83				MDCK sh1Hpn	16.89				MDCK sh1Hpn	9.94	0.00101803
MDCK sh1Hpn	26.68				MDCK sh1Hpn	16.86				MDCK sh1Hpn	9.82	0.00110633
MDCK sh2Hpn	26.64	26.69	0.278388		MDCK sh2Hpn	16.91	16.9433	0.0416333		MDCK sh2Hpn	9.73	0.00117755	0.00118137	0.000246517	0.000142327	0.160119
MDCK sh2Hpn	26.99				MDCK sh2Hpn	16.93				MDCK sh2Hpn	10.06	0.000936781
MDCK sh2Hpn	26.44				MDCK sh2Hpn	16.99				MDCK sh2Hpn	9.45	0.00142977
MDCK sh1Prss8	24.14	24.15	0.0173205		MDCK sh1Prss8	16.76	16.8167	0.106927		MDCK sh1Prss8	7.38	0.00600342	0.00621462	0.000514564	0.000297084	0.842312
MDCK sh1Prss8	24.17				MDCK sh1Prss8	16.75				MDCK sh1Prss8	7.42	0.00583925
MDCK sh1Prss8	24.14				MDCK sh1Prss8	16.94				MDCK sh1Prss8	7.2	0.00680118
MDCK sh2Prss8	24.49	24.4367	0.0680686		MDCK sh2Prss8	16.68	16.6967	0.0378594		MDCK sh2Prss8	7.81	0.00445611	0.00468056	0.000200662	0.000115852	0.63439
MDCK sh2Prss8	24.36				MDCK sh2Prss8	16.67				MDCK sh2Prss8	7.69	0.00484261
MDCK sh2Prss8	24.46				MDCK sh2Prss8	16.74				MDCK sh2Prss8	7.72	0.00474295
	Exp 1	Exp 2	Exp 3	Average	s.d.	s.e.m.	ttest vs scr
scr	1	1	1	1	0	0
sh1 Hpn	0.121643	0.195972	0.13574	0.151118	0.0394791	0.0227933	0.000720195
sh2 Hpn	0.12441	0.222333	0.160119	0.168954	0.049556	0.0286112	0.00118318
sh1 Prss8	0.726842	0.930115	0.842312	0.83309	0.10195	0.0588608	0.105116
sh2 Prss8	0.993923	0.790671	0.63439	0.806328	0.180277	0.104083	0.203847

## Sheet: Prostasin
Figure 5- Panel B
Experiment	Transcript level of PRSS8 in MDCK cells after shRNA transfection
Experiment 1
Sample	Prss8	Average	s.d.		Sample	Gapdh	Average	s.d.		Sample	ΔCt	Fold change	Average	s.d.	s.e.m	Ratio to scr
MDCK scr	24.3	24.3167	0.0208167		MDCK scr	16.35	16.43	0.072111		MDCK scr	7.95	0.004044	0.00422836	0.000190975	0.000110259	1
MDCK scr	24.34				MDCK scr	16.45				MDCK scr	7.89	0.00421574
MDCK scr	24.31				MDCK scr	16.49				MDCK scr	7.82	0.00442533
MDCK sh1Hpn	24.43	24.3233	0.092376		MDCK sh1Hpn	16.55	16.5933	0.0378594		MDCK sh1Hpn	7.88	0.00424506	0.00472272	0.000414028	0.000239039	1.11692
MDCK sh1Hpn	24.27				MDCK sh1Hpn	16.62				MDCK sh1Hpn	7.65	0.00497875
MDCK sh1Hpn	24.27				MDCK sh1Hpn	16.61				MDCK sh1Hpn	7.66	0.00494436
MDCK sh2Hpn	23.9	23.8967	0.0057735		MDCK sh2Hpn	16.05	15.97	0.07		MDCK sh2Hpn	7.85	0.00433426	0.00411301	0.000196069	0.0001132	0.972722
MDCK sh2Hpn	23.9				MDCK sh2Hpn	15.92				MDCK sh2Hpn	7.98	0.00396078
MDCK sh2Hpn	23.89				MDCK sh2Hpn	15.94				MDCK sh2Hpn	7.95	0.004044
MDCK sh1Prss8	26.1	26.17	0.06245		MDCK sh1Prss8	16.21	16.2133	0.0057735		MDCK sh1Prss8	9.89	0.00105393	0.00100694	4.29169e-05	2.47781e-05	0.238141
MDCK sh1Prss8	26.19				MDCK sh1Prss8	16.22				MDCK sh1Prss8	9.97	0.000997082
MDCK sh1Prss8	26.22				MDCK sh1Prss8	16.21				MDCK sh1Prss8	10.01	0.000969817
MDCK sh2Prss8	26.85	26.85	0.01		MDCK sh2Prss8	16.58	16.6067	0.023094		MDCK sh2Prss8	10.27	0.000809882	0.000825075	1.43674e-05	8.29502e-06	0.195129
MDCK sh2Prss8	26.84				MDCK sh2Prss8	16.62				MDCK sh2Prss8	10.22	0.000838443
MDCK sh2Prss8	26.86				MDCK sh2Prss8	16.62				MDCK sh2Prss8	10.24	0.0008269
Experiment 2
Sample	Prss8	Average	s.d.		Sample	Gapdh	Average	s.d.		Sample	ΔCt	Fold change	Average	s.d.	s.e.m	Ratio to scr
MDCK scr	24.53	24.5233	0.011547		MDCK scr	15.97	16.03	0.0519615		MDCK scr	8.56	0.00264962	0.00277644	0.000111585	6.44238e-05	1
MDCK scr	24.53				MDCK scr	16.06				MDCK scr	8.47	0.00282017
MDCK scr	24.51				MDCK scr	16.06				MDCK scr	8.45	0.00285954
MDCK sh1Hpn	24.1	24.1267	0.0305505		MDCK sh1Hpn	15.86	15.8667	0.0057735		MDCK sh1Hpn	8.24	0.0033076	0.00326243	5.95598e-05	3.43869e-05	1.17504
MDCK sh1Hpn	24.16				MDCK sh1Hpn	15.87				MDCK sh1Hpn	8.29	0.00319493
MDCK sh1Hpn	24.12				MDCK sh1Hpn	15.87				MDCK sh1Hpn	8.25	0.00328475
MDCK sh2Hpn	24.18	24.17	0.01		MDCK sh2Hpn	15.99	15.9867	0.0057735		MDCK sh2Hpn	8.19	0.00342424	0.00344012	1.3751e-05	7.93916e-06	1.23904
MDCK sh2Hpn	24.16				MDCK sh2Hpn	15.98				MDCK sh2Hpn	8.18	0.00344806
MDCK sh2Hpn	24.17				MDCK sh2Hpn	15.99				MDCK sh2Hpn	8.18	0.00344806
MDCK sh1Prss8	26.44	26.3833	0.0981495		MDCK sh1Prss8	16.14	16.1367	0.0152753		MDCK sh1Prss8	10.3	0.000793215	0.00082471	6.42408e-05	3.70895e-05	0.297038
MDCK sh1Prss8	26.44				MDCK sh1Prss8	16.12				MDCK sh1Prss8	10.32	0.000782295
MDCK sh1Prss8	26.27				MDCK sh1Prss8	16.15				MDCK sh1Prss8	10.12	0.000898621
MDCK sh2Prss8	26.54	26.5133	0.0832666		MDCK sh2Prss8	15.96	15.96	0.01		MDCK sh2Prss8	10.58	0.000653285	0.000666056	3.44266e-05	1.98762e-05	0.239895
MDCK sh2Prss8	26.42				MDCK sh2Prss8	15.95				MDCK sh2Prss8	10.47	0.000705044
MDCK sh2Prss8	26.58				MDCK sh2Prss8	15.97				MDCK sh2Prss8	10.61	0.000639841
Experiment 3
Sample	Prss8	Average	s.d.		Sample	Gapdh	Average	s.d.		Sample	ΔCt	Fold change	Average	s.d.	s.e.m	Ratio to scr
MDCK scr	24.79	24.7933	0.0152753		MDCK scr	17.68	17.6633	0.0208167		MDCK scr	7.11	0.00723897	0.00713965	8.60112e-05	4.96586e-05	1
MDCK scr	24.78				MDCK scr	17.64				MDCK scr	7.14	0.00708999
MDCK scr	24.81				MDCK scr	17.67				MDCK scr	7.14	0.00708999
MDCK sh1Hpn	24.12	24.1067	0.0152753		MDCK sh1Hpn	16.81	16.8533	0.0404145		MDCK sh1Hpn	7.31	0.00630189	0.00655752	0.000249859	0.000144256	0.918465
MDCK sh1Hpn	24.09				MDCK sh1Hpn	16.89				MDCK sh1Hpn	7.2	0.00680118
MDCK sh1Hpn	24.11				MDCK sh1Hpn	16.86				MDCK sh1Hpn	7.25	0.0065695
MDCK sh2Hpn	23.99	23.9967	0.0208167		MDCK sh2Hpn	16.91	16.9433	0.0416333		MDCK sh2Hpn	7.08	0.00739108	0.00753265	0.000290545	0.000167746	1.05504
MDCK sh2Hpn	24.02				MDCK sh2Hpn	16.93				MDCK sh2Hpn	7.09	0.00734002
MDCK sh2Hpn	23.98				MDCK sh2Hpn	16.99				MDCK sh2Hpn	6.99	0.00786684
MDCK sh1Prss8	26.24	26.22	0.06245		MDCK sh1Prss8	16.76	16.8167	0.106927		MDCK sh1Prss8	9.48	0.00140035	0.00148365	0.000178478	0.000103044	0.207804
MDCK sh1Prss8	26.27				MDCK sh1Prss8	16.75				MDCK sh1Prss8	9.52	0.00136205
MDCK sh1Prss8	26.15				MDCK sh1Prss8	16.94				MDCK sh1Prss8	9.21	0.00168855
MDCK sh2Prss8	26.55	26.5567	0.011547		MDCK sh2Prss8	16.68	16.6967	0.0378594		MDCK sh2Prss8	9.87	0.00106865	0.00107644	3.43566e-05	1.98358e-05	0.15077
MDCK sh2Prss8	26.57				MDCK sh2Prss8	16.67				MDCK sh2Prss8	9.9	0.00104665
MDCK sh2Prss8	26.55				MDCK sh2Prss8	16.74				MDCK sh2Prss8	9.81	0.00111403
	Exp 1	Exp 2	Exp 3	Average	s.d.	s.e.m.	ttest vs scr
scr	1	1	1	1	0	0
sh1 Hpn	1.11692	1.17504	0.918465	1.07014	0.13453	0.0776711	0.461816
sh2 Hpn	0.972722	1.23904	1.05504	1.08893	0.136354	0.0787241	0.375869
sh1 Prss8	0.238141	0.297038	0.207804	0.247661	0.0453724	0.0261957	0.00121017
sh2 Prss8	0.195129	0.239895	0.15077	0.195265	0.0445631	0.0257285	0.0010206
