# Supplementary material for: The serine protease hepsin mediates urinary secretion and polymerisation of Zona Pellucida domain protein uromodulin
Source: eLife. 2015 Dec 17;4:e08887. doi: 10.7554/eLife.08887 (PMC4755741; doi:10.7554/eLife.08887)
Supplement: Figure 5—source data 2. — DOI: http://dx.doi.org/10.7554/eLife.08887.014 [file elife-08887-fig5-data2.xlsx]

## Sheet: Sheet1
Figure 5_Panel C
Experiment	Quantification of the area of uromodulin polymers on the surface of MDCK cells after shRNA transfection
Ctr	sh1 Hpn	sh2 Hpn	sh1 Prss8	sh2 Prss8
1.92908	0.682575	0.260856	3.28562	1.1549	Experiment 1
1.87916	0.245	0.159049	1.62971	1.29734
1	0.342189	0.263743	1.30155	1.75769
1.38695	0.308467	0.209249	2.12259	0.87465
2.08853	0.183238	0.174306	1.29358	1.06675
2.67274	0.89792	0.908119	2.62993	2.50596	Experiment 2
5.10456	0.56752	0.422964	1.77302	2.7654
1	0.388945	0.194806	4.64055	1.14264
2.98096	0.999596	0.273465	2.15848	3.18988
3.67355	0.464615	0.355316	5.88252	2.04343
5.12196	1.08961	0.400005	3.64594	5.44096	Experiment 3
7.03038	0.296456	0.19978	1.25063	7.39105
4.60595	0.689031	0.183117	2.18732	2.17756
1	1.0385	0.163215	3.18378	2.26748
3.47978	0.410395	0.31579	1.84002	3.65898
2.99691	0.573604	0.298919	2.58835	2.58231	Average
1.82016	0.30798	0.188823	1.33235	1.79426	s.d.
0.469964	0.07952	0.0487538	0.344011	0.463276	s.e.m.
1	0.191399	0.0997424	0.863674	0.861659	Ratio to WT
0.156817	0.026534	0.016268	0.114789	0.154585	s.e.m.
	< 0,0001	< 0,0001	0.7088	0.5896	Mann Whitney
