# Supplementary material for: The serine protease hepsin mediates urinary secretion and polymerisation of Zona Pellucida domain protein uromodulin
Source: eLife. 2015 Dec 17;4:e08887. doi: 10.7554/eLife.08887 (PMC4755741; doi:10.7554/eLife.08887)
Supplement: Figure 6—source data 1. — DOI: http://dx.doi.org/10.7554/eLife.08887.016 [file elife-08887-fig6-data1.xlsx]

## Sheet: Sheet1
Figure 6- Panel A
Experiment	Transcript level of Hpn in mouse microdissected nephron segments
	Hpn	Gapdh	ΔCt	Fold change	Average	s.d.	s.e.m.	% to PST	s.e.m.
Gl1	30.79	23.69	7.1	0.00728932	0.00667701	0.00119565	0.000690306	4.52968	0.468304
Gl2	30.5	22.94	7.56	0.00529924
Gl3	30.4	23.33	7.07	0.00744248
PCT1	25.4	21.48	3.92	0.0660636	0.0598927	0.00620187	0.00358065	40.6312	2.42911
PCT2	25.44	21.22	4.22	0.0536603
PCT3	24.83	20.77	4.06	0.059954
PST1	25.09	22.53	2.56	0.169576	0.147406	0.0192519	0.0111151	100	7.54046
PST2	24.88	21.99	2.89	0.134904
PST3	24.86	22	2.86	0.137738
TAL1	27.86	23.75	4.11	0.0579118	0.0609165	0.00485968	0.00280574	41.3257	1.90341
TAL2	28.77	24.67	4.1	0.0583146
TAL3	28.32	24.41	3.91	0.0665231
DCT1	26.68	22.33	4.35	0.0490365	0.050675	0.00201266	0.00116201	34.3779	0.788308
DCT2	26.39	22.07	4.32	0.0500669
DCT3	26.65	22.41	4.24	0.0529216
CD1	29.75	23.52	6.23	0.0133224	0.0165844	0.00329683	0.00190343	11.2509	1.29128
CD2	29.3	23.38	5.92	0.0165159
CD3	34.45	28.8	5.65	0.019915
