# Supplementary material for: The serine protease hepsin mediates urinary secretion and polymerisation of Zona Pellucida domain protein uromodulin
Source: eLife. 2015 Dec 17;4:e08887. doi: 10.7554/eLife.08887 (PMC4755741; doi:10.7554/eLife.08887)
Supplement: Figure 6—source data 2. — DOI: http://dx.doi.org/10.7554/eLife.08887.017 [file elife-08887-fig6-data2.xlsx]

## Sheet: Sheet1
Figure 6- Panel C
Experiment	Quantification of urinary uromodulin secretion in Hpn-/- and control mice
	mouse id	raw data	average	s.d.	Ratio to WT	s.d.		ttest
wt	1	42732141	5.35313e+07	1.97242e+07	1	0.368461		0.000139792
	2	48501262
	3	22470836
	4	74141496
	5	62204061
	6	47444798
	7	4.88624e+07
	8	9.00794e+07
	9	6.47128e+07
	10	3.4164e+07
Hpn-/-	1	8617773	1.66259e+07	1.10697e+07	0.310582	0.206789
	2	11593279
	3	25854170
	4	18463141
	5	21293605
	6	39227475
	7	2.34951e+07
	8	5.94888e+06
	9	5.55989e+06
	10	6.20547e+06
