# Supplementary material for: The serine protease hepsin mediates urinary secretion and polymerisation of Zona Pellucida domain protein uromodulin
Source: eLife. 2015 Dec 17;4:e08887. doi: 10.7554/eLife.08887 (PMC4755741; doi:10.7554/eLife.08887)
Supplement: Figure 6—source data 3. — DOI: http://dx.doi.org/10.7554/eLife.08887.018 [file elife-08887-fig6-data3.xlsx]

## Sheet: Sheet1
Figure 6-Panel D
Experiment	Quantification of uromodulin levels in kidney lysates of Hpn -/- and control mice
	raw
	UMOD	Actin	Ratio	Average	s.d.	Ratio to WT	s.d.		ttest
wt1	13759894	28758534	0.478463	0.766136	0.583809	1	0.762018		0.00758855
wt2	11138610	29159534	0.381989
wt3	35189011	24471563	1.43796
Hpn-/- 1	75082541	16019886	4.68683	3.90081	0.819547	5.09155	1.06972
Hpn-/- 2	74821591	18874371	3.96419
Hpn-/- 3	60826550	19933856	3.05142
