# Supplementary material for: The serine protease hepsin mediates urinary secretion and polymerisation of Zona Pellucida domain protein uromodulin
Source: eLife. 2015 Dec 17;4:e08887. doi: 10.7554/eLife.08887 (PMC4755741; doi:10.7554/eLife.08887)
Supplement: Figure 6—source data 4. — DOI: http://dx.doi.org/10.7554/eLife.08887.019 [file elife-08887-fig6-data4.xlsx]

## Sheet: Sheet1
Figure 6 - Panel F
Experiment	Transcript level of Umod in Hpn-/- and control mice
Sample	Umod	Average	s.d.		Sample	Hprt1	Average	s.d.		Sample	ΔCt	Fold change	Average	s.d.	s.e.m.	Ratio to WT	s.e.m.	ttest
wt1	21.54	21.6267	0.0757188		wt1	24.12	24.14	0.034641		wt1	-2.51333	5.70938	7.43591	2.66682	1.53969	1	0.207061	0.770974
	21.66					24.12
	21.68					24.18
wt2	21.58	21.63	0.06245		wt2	24.24	24.2367	0.0057735		wt2	-2.60667	6.09095
	21.61					24.24
	21.7					24.23
wt3	21.09	21.11	0.0173205		wt3	24.54	24.5033	0.0351188		wt3	-3.39333	10.5074
	21.12					24.47
	21.12					24.5
Hpn-/-1	21.22	21.2333	0.011547		Hpn-/-1	24.09	24.1267	0.0404145		Hpn-/-1	-2.89333	7.42985	6.91728	0.587155	0.338994	0.930254	0.0455888
	21.24					24.17
	21.24					24.12
Hpn-/-2	21.43	21.44	0.0173205		Hpn-/-2	24.17	24.2567	0.0776745		Hpn-/-2	-2.81667	7.04533
	21.43					24.28
	21.46					24.32
Hpn-/-3	21.29	21.3167	0.0305505		Hpn-/-3	23.9	23.9667	0.0702377		Hpn-/-3	-2.65	6.27667
	21.31					23.96
	21.35					24.04
