# Supplementary material for: The serine protease hepsin mediates urinary secretion and polymerisation of Zona Pellucida domain protein uromodulin
Source: eLife. 2015 Dec 17;4:e08887. doi: 10.7554/eLife.08887 (PMC4755741; doi:10.7554/eLife.08887)
Supplement: Figure 7—source data 1. — DOI: http://dx.doi.org/10.7554/eLife.08887.021 [file elife-08887-fig7-data1.xlsx]

## Sheet: Sheet1
Figure 7- Figure Supplement 2A
Experiment	Transcript level of Prss8 in microdissected nephron segments
	Prss8	Gapdh	ΔCt	Fold change	Average	s.d.	s.e.m.	% to PCT	s.e.m.
PCT1	22.53	19.63	2.9	0.133972	0.135874	0.0119397	0.00689337	100	5.07335
PCT2	22.39	19.39	3	0.125
PCT3	21.49	18.74	2.75	0.148651
PST1	22.28	19.16	3.12	0.115023	0.124632	0.0087455	0.00504922	91.7259	3.7161
PST2	22.13	19.21	2.92	0.132127
PST3	22.09	19.11	2.98	0.126745
TAL1	25.02	20.11	4.91	0.0332616	0.0380429	0.00458134	0.00264504	27.9986	1.94668
TAL2	25.2	20.5	4.7	0.0384733
TAL3	24.63	20.07	4.56	0.0423939
CD1	31.13	25.35	5.78	0.018199	0.048777	0.0265566	0.0153324	35.8986	11.2843
CD2	23.23	19.22	4.01	0.0620683
CD3	23.36	19.44	3.92	0.0660636
