# Supplementary material for: The serine protease hepsin mediates urinary secretion and polymerisation of Zona Pellucida domain protein uromodulin
Source: eLife. 2015 Dec 17;4:e08887. doi: 10.7554/eLife.08887 (PMC4755741; doi:10.7554/eLife.08887)
Supplement: Figure 7—source data 2. — DOI: http://dx.doi.org/10.7554/eLife.08887.022 [file elife-08887-fig7-data2.xlsx]

## Sheet: Sheet1
Figure 7- Figure Supplement 2C
Experiment	Quantification of urinary uromodulin secretion in Prss8 -/- and control mice
	mouse id	raw data	Average	s.d.	Ratio	s.d.	ttest
wt	1	18978761	1.91607e+07	1.24342e+07	1	0.648944	0.581273
	2	10741347
	3	40190903
	4	16688640
	5	9203782
Prss8-/-	1	31539518	2.34974e+07	1.13975e+07	1.22634	0.594839
	2	33852681
	3	4975740
	4	22035317
	5	25083933
