# Supplementary material for: The serine protease hepsin mediates urinary secretion and polymerisation of Zona Pellucida domain protein uromodulin
Source: eLife journal article supplement (doi:10.7554/elife.08887), 2015-12-17
Supplement: supp [file elife_poa_e08887_Figure_7_figure_supplement_1.pdf › elife_poa_e08887_Figure_7_figure_supplement_1.pdf]

A

| MOUSE UROMODULIN |             |            |             |
|------------------|-------------|------------|-------------|
| 1.               | MGIPLTWMLL  | VMMVTSWFTL | AEASNSTEAR  |
| 41.              | CTVDGVVTC   | SCQTGFTGDG | LVCEDMDECA  |
| 81.              | SCVNTPGSFK  | CSCQDGFRLT | PELSCTDVDE  |
| 121.             | ALATCVNTEG  | DYLCVCPEGF | TGDGWYCECS  |
| 161.             | LPQGPDKLV   | CQDPCNTYET | LTEYWRSTEY  |
| 201.             | HGWYRFTGQG  | GVRMAETCVF | VLRCNTAAPM  |
| 241.             | EGIVSRITACA | HWSDQCCRWS | TEIQVKACPG  |
| 281.             | PECNLAYCTD  | PSSVEGTCCE | CRVDEDCISD  |
| 321.             | DSNITDVSQI  | EYRLECGAND | IKMSLRKCQL  |
| 361.             | YLNDRCQSGF  | SESDEDRWMS | IVTPARNGPC  |
| 401.             | ATYSNTLYLA  | NAIIIRDIII | RMNFECSTPL  |
| 441.             | QPMVSALNIS  | LGGTGKFTVR | MALFQSPITYT |
| 481.             | STEAFLYVGT  | MLDGGDLRF  | VLLMTNCTAT  |
| 521.             | YFIIQDSCPR  | TEDTTIQVTE | NGESSQARFS  |
| 561.             | DLVYLHCEVY  | LCDSTSEQCK | PTCSGTRFRS  |
| 601.             | NLGPITR     | QGVQASVSK  | AASS        |
| 641.             | VQ          |            |             |

B

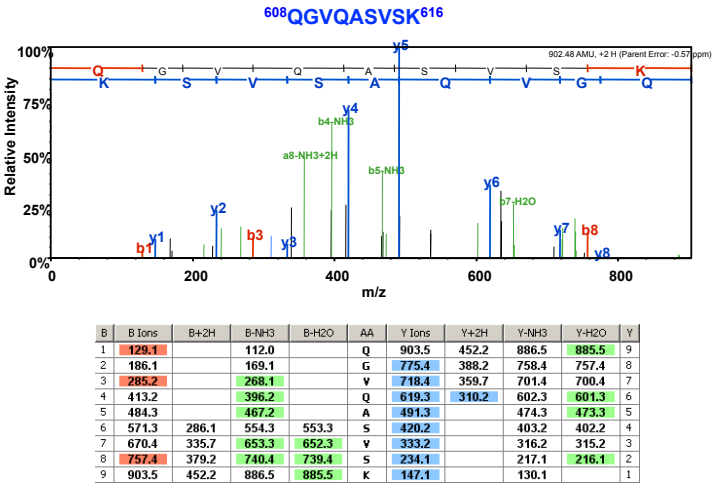

Figure 7–figure supplement 1
