# Supplementary figures and images for: The serine protease hepsin mediates urinary secretion and polymerisation of Zona Pellucida domain protein uromodulin
Source: eLife journal article supplement (doi:10.7554/elife.08887), 2015-12-17

**A**

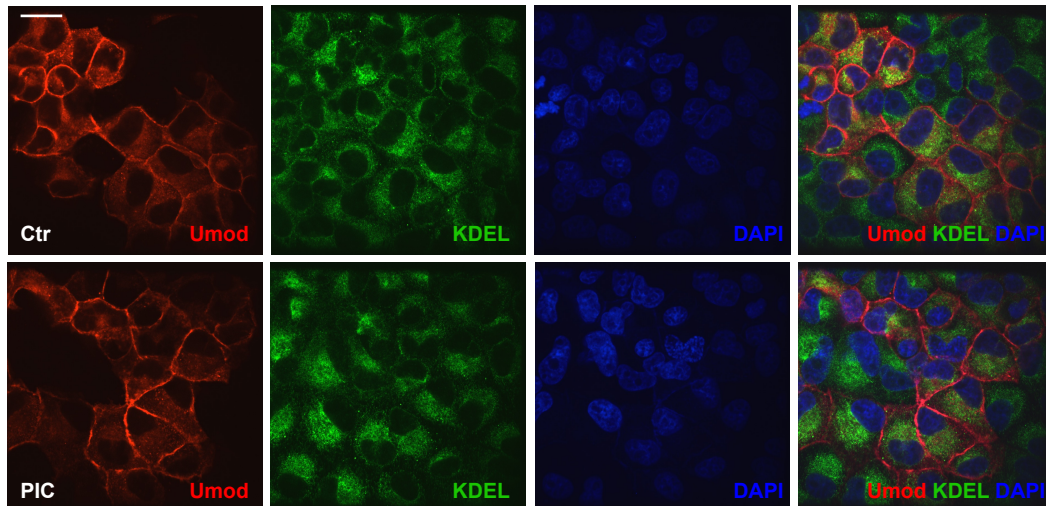

**B**

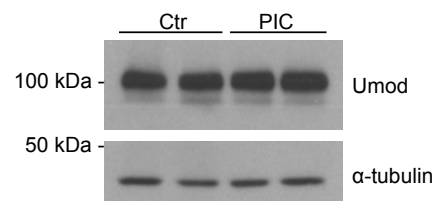

**Figure 2–figure supplement 1**

Supplement: supp [file elife_poa_e08887_Figure_2_figure_supplement_1.pdf › elife_poa_e08887_Figure_2_figure_supplement_1.pdf]

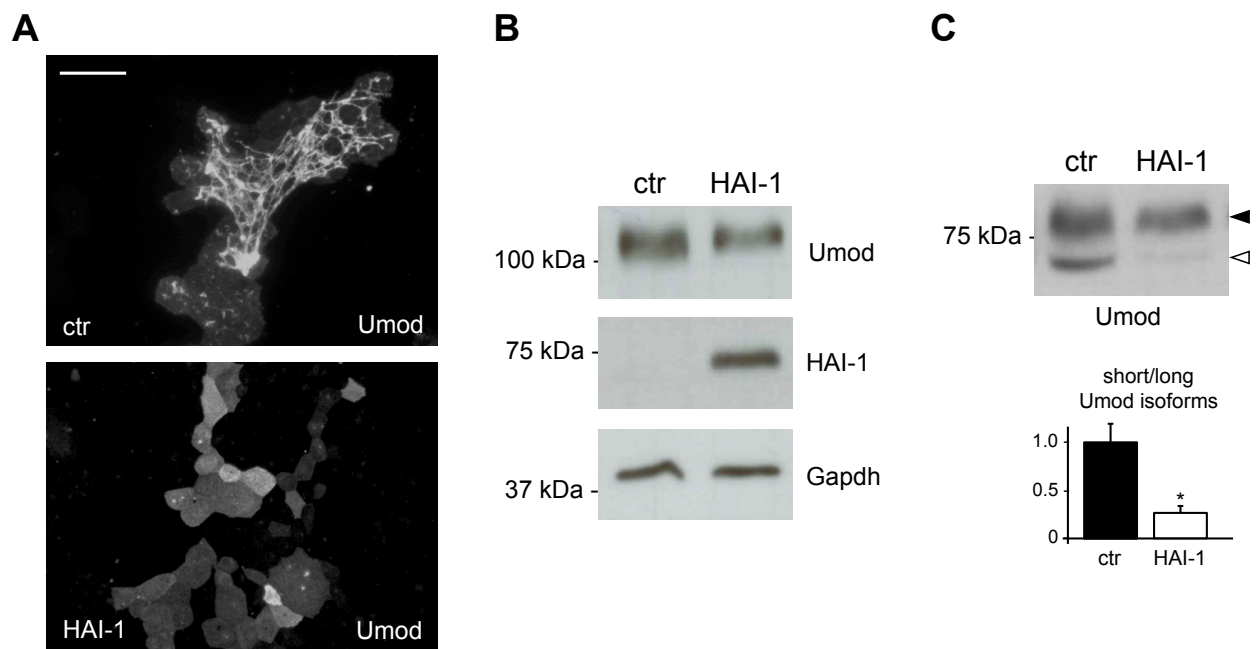

**Figure 2–figure supplement 2**

Supplement: supp [file elife_poa_e08887_Figure_2_figure_supplement_2.pdf › elife_poa_e08887_Figure_2_figure_supplement_2.pdf]

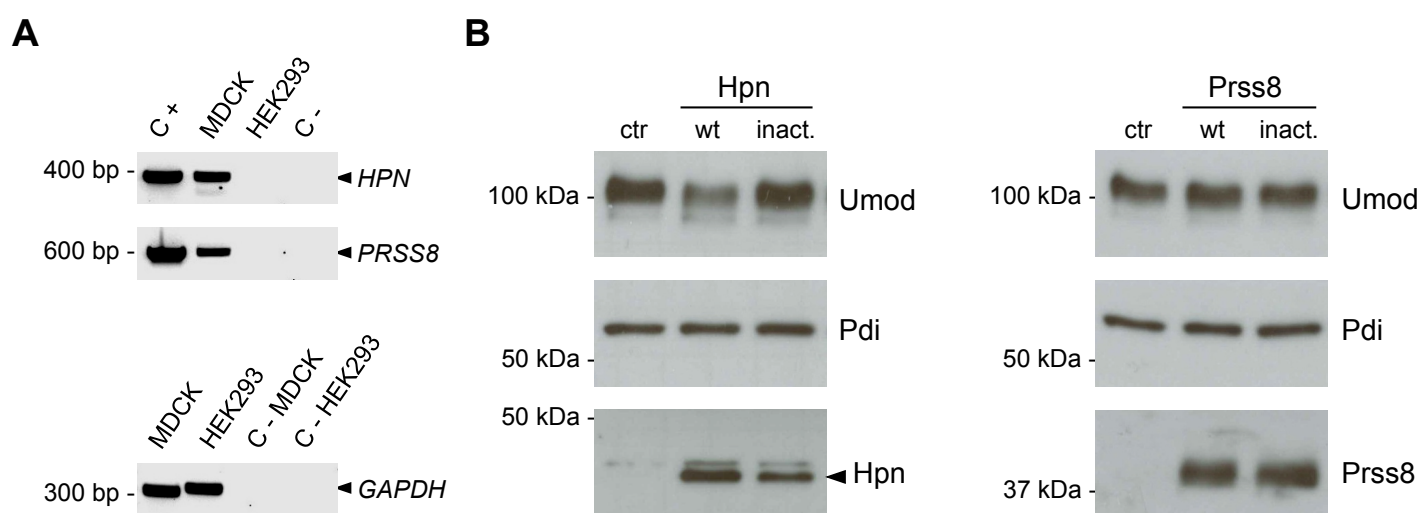

**Figure 3–figure supplement 1**

Supplement: supp [file elife_poa_e08887_Figure_3_figure_supplement_1.pdf › elife_poa_e08887_Figure_3_figure_supplement_1.pdf]
